# Supplementary material for: Identifying Drivers of Parallel Evolution: A Regression Model Approach
Source: PubMed Central journal article supplement — Genome Biol Evol. 2018 Sep 25;10(10):2801–12. doi: 10.1093/gbe/evy210 (PMC6200314; doi:10.1093/gbe/evy210), 2018-09-25
Supplement: evy210_supp.pdf [file evy210_supp.pdf]

## SUPPLEMENTARY TABLES

**Table S1:** Correlations between all explanatory variables used in this study (excluding “essential genes”, as this is a binary variable). Significant correlations are indicated in bold (significance threshold of 0.05).

|                    | <i>dN/dS</i>   | <i>length</i> | <i>multifunc.</i> | <i>PPI.degree</i> | <i>num.domains</i> | <i>CAI</i>     | <i>expression</i> | <i>gc</i>      | <i>r</i>       |
|--------------------|----------------|---------------|-------------------|-------------------|--------------------|----------------|-------------------|----------------|----------------|
| <i>dS</i>          | <b>-0.0436</b> | <b>0.1205</b> | 0.0244            | 0.0028            | <b>0.0613</b>      | 0.0047         | -0.0174           | -0.0117        | 0.0060         |
| <i>dN/dS</i>       |                | <b>0.0797</b> | <b>-0.2201</b>    | <b>-0.2181</b>    | <b>-0.1127</b>     | <b>-0.3691</b> | <b>-0.2498</b>    | <b>-0.1733</b> | <b>-0.0649</b> |
| <i>length</i>      |                |               | <b>0.2343</b>     | 0.0377            | <b>0.3845</b>      | <b>-0.0789</b> | <b>-0.1315</b>    | <b>-0.2930</b> | <b>-0.1132</b> |
| <i>multifunc.</i>  |                |               |                   | <b>0.1705</b>     | <b>0.2085</b>      | <b>0.1022</b>  | <b>0.0666</b>     | -0.0120        | -0.0253        |
| <i>PPI.degree</i>  |                |               |                   |                   | <b>0.0954</b>      | <b>0.2142</b>  | <b>0.1524</b>     | 0.0263         | 0.0176         |
| <i>num.domains</i> |                |               |                   |                   |                    | <b>0.0734</b>  | 0.0160            | -0.0183        | -0.0342        |
| <i>CAI</i>         |                |               |                   |                   |                    |                | <b>0.7819</b>     | <b>0.1911</b>  | <b>0.0726</b>  |
| <i>expression</i>  |                |               |                   |                   |                    |                |                   | <b>0.2262</b>  | <b>0.0780</b>  |
| <i>gc</i>          |                |               |                   |                   |                    |                |                   |                | <b>0.3241</b>  |

**Table S2:** P-values and change in pseudo-R<sup>2</sup> for synonymous mutation models including each of the genomic variables. The tested regression models are all of the form  $\text{Pois}(\lambda_S = \text{constant} * L_i * \text{variable}_i^a)$  and compared using a likelihood-ratio test against a null model of  $\text{Pois}(\lambda_S = \text{constant} * L_i)$ .

| Variable         | P-value | $\Delta R^2$ |
|------------------|---------|--------------|
| <i>dS</i>        | 0.090   | 0.0005       |
| <i>dN/dS</i>     | 0.034   | 0.0024       |
| <i>multifunc</i> | 0.565   | 0.0004       |
| <i>PPI</i>       | 0.791   | 0.0005       |
| <i>num.dom</i>   | 0.590   | <0.0001      |
| <i>CAI</i>       | 0.043   | 0.0011       |
| <i>expr</i>      | 0.089   | 0.0017       |
| <i>gc</i>        | 0.125   | <0.0001      |
| <i>r</i>         | 0.572   | 0.0007       |
